# Supplementary material
Source: PubMed Central journal article supplement (PMC4115505)
Supplement: 1402605111_pnas.201402605SI.pdf [file 1402605111_pnas.201402605SI.pdf]

# Supporting Information

Hsu et al. 10.1073/pnas.1402605111

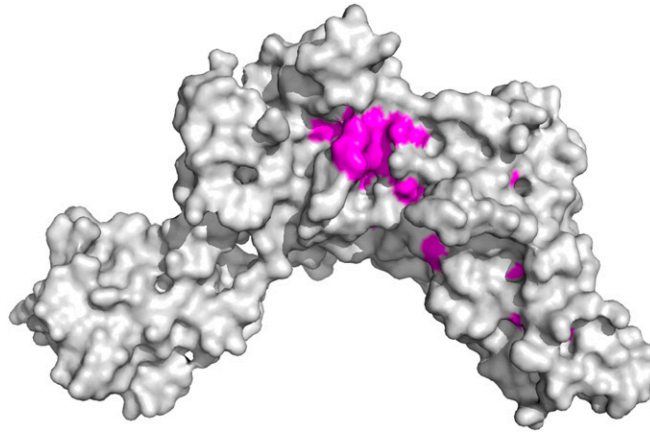

**Movie S1.** Mapping of identical residues on the surface of the substrate of Icm/Dot transporter N-terminal ubiquitin ligase domain.

[Movie S1](#)

## Other Supporting Information Files

[SI Appendix \(PDF\)](#)
